# Supplementary material
Source: Research Square preprint supplement (doi:10.21203/rs.3.rs-9137000/v1)
Supplement: Supplementary file 1 [file 37160548ed1c55ea8d9cad40.docx]

**Table 3. Gender Distribution Disparities in Pediatric Poisoning Cases by Drug Category**

|  | Boys(n, %) | Girls (n, %) | Total (n, %) | χ² | P |
| --- | --- | --- | --- | --- | --- |
| Drug Classification |  |  |  | 23.513 | <0.0001 |
| Antipsychotics | 12(8.3) | 75(51.7) | 87(60.0) |  |  |
| Pediatric drugs | 12(8.3) | 9(6.2) | 21(14.5) |  |  |
| Antihypertensive Drugs | 7(4.8) | 7(4.8) | 14(9.7) |  |  |
| Other drugs | 10(6.9) | 13(9.0) | 23() |  |  |
| Total | 41(28.3) | 104(71.7) | 145(100) |  |  |
