# Supplementary material
Source: Research Square preprint supplement (doi:10.21203/rs.3.rs-9137000/v1)
Supplement: Supplementary file 2 [file 3959e0146cb14e12fda11ce5.docx]

**Table 1. Distribution by Gender and Age among 208 Pediatric Cases of Acute Poisoning**

|  |  |  |  |
| --- | --- | --- | --- |
| Age Group | Boys(n, %) | Girls (n, %) | Total (n, %) |
| ＜1 year | 6（2.9） | 3（1.4） | 9（4.3） |
| 1–3 years | 50（24.0） | 35（16.8） | 85（40.9） |
| 4–7 years | 11（5.3） | 6（2.9） | 17（8.2） |
| 8–10 years | 6（2.9） | 0（0） | 6（2.9） |
| 11–14 years | 7（3.4） | 84（40.4） | 91（43.8） |
| total（n,%） | 80（38.5） | 128（61.5） | 208（100） |
