# Supplementary material
Source: Research Square preprint supplement (doi:10.21203/rs.3.rs-9137000/v1)
Supplement: Supplementary file 3 [file 55e53b3bc225b3cc940b3dcc.docx]

**Table 2 Distribution of Toxic Substance Categories in Poisoning Incidents**

| Poisoning types | Drugs | Chemical agents | Weed killers | Rodenticides | Insecticides | Gases | Mushrooms | Total |
| --- | --- | --- | --- | --- | --- | --- | --- | --- |
| Frequency | 145 | 35 | 11 | 6 | 4 | 6 | 1 | 208 |
| Percentage (%) | 69.7 | 16.8 | 5.3 | 2.9 | 1.9 | 2.9 | 0.5 | 100 |
