# Supplementary material
Source: Research Square preprint supplement (doi:10.21203/rs.3.rs-9137000/v1)
Supplement: Supplementary file 4 [file 779893f89d6732b07862ddf2.docx]

**Table 4. Distribution Differences of Intentional and Unintentional Poisoning with Antipsychotic Medications in Children by Gender**

| Gender | Unintentional exposure (n，%） | Intentional  exposure (n，%) | *P* |
| --- | --- | --- | --- |
| Boys | 7（46.7） | 4（5.6） | <0.0001 |
| Girls | 8（53.3） | 68（94.4） |  |
