# Supplementary material
Source: Research Square preprint supplement (doi:10.21203/rs.3.rs-9137000/v1)
Supplement: Supplementary file 5 [file f0ccc05f1650f6f8ddc52bd4.xlsx]

## Sheet: Sheet1
Number	Year	Name	Gender	Age	Types of poisoning	Cause of poisoning
1	2020	***	female	13Y	Drug intoxication	antihypertensive drugs
2	2020	***	male	1Y	Drug intoxication	antihypertensive drugs
3	2020	***	male	4Y	Drug intoxication	antihypertensive drugs
4	2020	***	female	13Y	Drug intoxication	Antipsychotic drugs
5	2020	***	female	13Y	Drug intoxication	Antipsychotic drugs
6	2020	***	female	13Y	Drug intoxication	Antipsychotic drugs
7	2020	***	female	13Y	Drug intoxication	Antipsychotic drugs
8	2020	***	female	13Y	Drug intoxication	Antipsychotic drugs
9	2020	***	female	13Y	Drug intoxication	Antipsychotic drugs
10	2020	***	female	14Y	Drug intoxication	Antipsychotic drugs
11	2020	***	female	1Y10M	Drug intoxication	Antipsychotic drugs
12	2020	***	female	1Y4M	Drug intoxication	Antipsychotic drugs
13	2020	***	male	2Y11M	Drug intoxication	Antipsychotic drugs
14	2020	***	female	3Y	Drug intoxication	Antipsychotic drugs
15	2020	***	female	14Y	Drug intoxication	Antipsychotic drugs
16	2020	***	female	1Y8M	Chemical intoxication	Chemical preparations (for household use)
17	2020	***	male	1Y8M	Chemical intoxication	Chemical preparations (for household use)
18	2020	***	female	1Y9M	Chemical intoxication	Chemical preparations (for household use)
19	2020	***	female	2Y	Chemical intoxication	Chemical preparations (for household use)
20	2020	***	female	2Y6M	Chemical intoxication	Chemical preparations (for household use)
21	2020	***	male	3Y	Chemical intoxication	Chemical preparations (for household use)
22	2020	***	male	8Y	Chemical intoxication	Chemical preparations (industrial)
23	2020	***	male	5Y	pesticide poisoning	herbicide
24	2020	***	male	1Y3M	Drug intoxication	others
25	2020	***	female	2Y	Drug intoxication	others
26	2020	***	female	1Y3M	Drug intoxication	Pediatric drugs
27	2020	***	male	2Y6M	Drug intoxication	Pediatric drugs
28	2020	***	female	3Y7M	Drug intoxication	Pediatric drugs
29	2020	***	male	8M	Drug intoxication	Pediatric drugs
30	2020	***	male	1Y8M	rodenticide poisoning	rodenticide poisoning
31	2020	***	female	3Y	rodenticide poisoning	rodenticide poisoning
32	2021	***	male	2Y8M	Drug intoxication	antihypertensive drugs
33	2021	***	female	3Y	Drug intoxication	antihypertensive drugs
34	2021	***	female	3Y	Drug intoxication	antihypertensive drugs
35	2021	***	female	3Y	Drug intoxication	antihypertensive drugs
36	2021	***	female	12Y3M	Drug intoxication	Antipsychotic drugs
37	2021	***	female	12Y4M	Drug intoxication	Antipsychotic drugs
38	2021	***	female	12Y5M	Drug intoxication	Antipsychotic drugs
39	2021	***	female	13Y	Drug intoxication	Antipsychotic drugs
40	2021	***	female	13Y	Drug intoxication	Antipsychotic drugs
41	2021	***	female	13Y6M	Drug intoxication	Antipsychotic drugs
42	2021	***	male	13Y7M	Drug intoxication	Antipsychotic drugs
43	2021	***	female	14Y	Drug intoxication	Antipsychotic drugs
44	2021	***	male	2Y5M	Drug intoxication	Antipsychotic drugs
45	2021	***	male	3Y	Drug intoxication	Antipsychotic drugs
46	2021	***	female	4Y	Drug intoxication	Antipsychotic drugs
47	2021	***	female	13Y5M	Drug intoxication	Antipsychotic drugs
48	2021	***	female	13Y8M	Drug intoxication	Antipsychotic drugs
49	2021	***	male	12Y5M	Chemical intoxication	Chemical preparations (for household use)
50	2021	***	male	1M	Chemical intoxication	Chemical preparations (for household use)
51	2021	***	male	1Y5M	Chemical intoxication	Chemical preparations (for household use)
52	2021	***	female	1Y6M	Chemical intoxication	Chemical preparations (for household use)
53	2021	***	male	1Y6M	Chemical intoxication	Chemical preparations (for household use)
54	2021	***	male	3Y	Chemical intoxication	Chemical preparations (for household use)
55	2021	***	male	3Y	Chemical intoxication	Chemical preparations (for household use)
56	2021	***	female	5Y	Chemical intoxication	Chemical preparations (for household use)
57	2021	***	female	8M	Chemical intoxication	Chemical preparations (for household use)
58	2021	***	male	10Y	gas poisoning	CO
59	2021	***	male	6Y	gas poisoning	CO
60	2021	***	male	13Y	insect repellant	insect repellant
61	2021	***	male	5Y	Drug intoxication	others
62	2021	***	female	13Y	Drug intoxication	Pediatric drugs
63	2021	***	female	2Y	Drug intoxication	Pediatric drugs
64	2021	***	male	2Y	Drug intoxication	Pediatric drugs
65	2021	***	male	3Y5M	Drug intoxication	Pediatric drugs
66	2021	***	female	4Y	Drug intoxication	Pediatric drugs
67	2021	***	male	4Y4M	Drug intoxication	Pediatric drugs
68	2022	***	female	12Y8Y	Drug intoxication	antihypertensive drugs
69	2022	***	male	2Y5M	Drug intoxication	antihypertensive drugs
70	2022	***	female	11Y9Y	Drug intoxication	Antipsychotic drugs
71	2022	***	female	1Y6M	Drug intoxication	Antipsychotic drugs
72	2022	***	female	1Y7M	Drug intoxication	Antipsychotic drugs
73	2022	***	female	1Y7M	Drug intoxication	Antipsychotic drugs
74	2022	***	male	4Y	Drug intoxication	Antipsychotic drugs
75	2022	***	male	1Y1M	Chemical intoxication	Chemical preparations (for household use)
76	2022	***	male	1Y9M	Chemical intoxication	Chemical preparations (for household use)
77	2022	***	male	3Y4M	Chemical intoxication	Chemical preparations (for household use)
78	2022	***	female	6Y	gas poisoning	CO
79	2022	***	male	12Y11Y	gas poisoning	fire extinguisher dry chemical
80	2022	***	male	10Y	pesticide poisoning	herbicide
81	2022	***	female	13Y	pesticide poisoning	herbicide
82	2022	***	female	2Y	pesticide poisoning	herbicide
83	2022	***	female	3Y	pesticide poisoning	herbicide
84	2022	***	male	3Y	pesticide poisoning	herbicide
85	2022	***	male	8Y	pesticide poisoning	herbicide
86	2022	***	female	12Y5M	insect repellant	insect repellant
87	2022	***	male	1Y7M	Drug intoxication	others
88	2022	***	male	2Y4M	Drug intoxication	others
89	2022	***	female	3Y	Drug intoxication	others
90	2022	***	male	3Y2M	Drug intoxication	others
91	2022	***	male	4Y	Drug intoxication	Pediatric drugs
92	2022	***	male	11M	rodenticide poisoning	rodenticide poisoning
93	2022	***	male	2Y6M	rodenticide poisoning	rodenticide poisoning
94	2023	***	female	9M	Drug intoxication	antihypertensive drugs
95	2023	***	female	11Y6M	Drug intoxication	Antipsychotic drugs
96	2023	***	female	12Y11M	Drug intoxication	Antipsychotic drugs
97	2023	***	female	13Y1M	Drug intoxication	Antipsychotic drugs
98	2023	***	female	13Y4M	Drug intoxication	Antipsychotic drugs
99	2023	***	female	13Y8M	Drug intoxication	Antipsychotic drugs
100	2023	***	female	13Y8M	Drug intoxication	Antipsychotic drugs
101	2023	***	female	13Y8M	Drug intoxication	Antipsychotic drugs
102	2023	***	female	1Y8Y	Chemical intoxication	Chemical preparations (for household use)
103	2023	***	male	1Y8Y	Chemical intoxication	Chemical preparations (for household use)
104	2023	***	female	13Y3Y	pesticide poisoning	herbicide
105	2023	***	female	2Y	Drug intoxication	others
106	2023	***	female	3Y	Drug intoxication	others
107	2023	***	female	3Y8Y	Drug intoxication	others
108	2023	***	female	13Y7M	Drug intoxication	Pediatric drugs
109	2023	***	female	2Y	Drug intoxication	Pediatric drugs
110	2024	***	female	12Y7M	Drug intoxication	antihypertensive drugs
111	2024	***	male	2Y2M	Drug intoxication	antihypertensive drugs
112	2024	***	female	11Y11M	Drug intoxication	Antipsychotic drugs
113	2024	***	female	12Y10M	Drug intoxication	Antipsychotic drugs
114	2024	***	female	12Y3M	Drug intoxication	Antipsychotic drugs
115	2024	***	female	12Y3M	Drug intoxication	Antipsychotic drugs
116	2024	***	female	12Y5M	Drug intoxication	Antipsychotic drugs
117	2024	***	female	12Y7M	Drug intoxication	Antipsychotic drugs
118	2024	***	female	12Y8M	Drug intoxication	Antipsychotic drugs
119	2024	***	female	12Y8M	Drug intoxication	Antipsychotic drugs
120	2024	***	male	13Y	Drug intoxication	Antipsychotic drugs
121	2024	***	female	13Y10M	Drug intoxication	Antipsychotic drugs
122	2024	***	female	13Y11M	Drug intoxication	Antipsychotic drugs
123	2024	***	female	13Y11M	Drug intoxication	Antipsychotic drugs
124	2024	***	female	13Y3M	Drug intoxication	Antipsychotic drugs
125	2024	***	female	13Y3M	Drug intoxication	Antipsychotic drugs
126	2024	***	female	13Y4M	Drug intoxication	Antipsychotic drugs
127	2024	***	female	13Y5M	Drug intoxication	Antipsychotic drugs
128	2024	***	female	13Y6M	Drug intoxication	Antipsychotic drugs
129	2024	***	female	13Y7M	Drug intoxication	Antipsychotic drugs
130	2024	***	female	13Y8M	Drug intoxication	Antipsychotic drugs
131	2024	***	male	1Y6M	Drug intoxication	Antipsychotic drugs
132	2024	***	male	1Y6M	Drug intoxication	Antipsychotic drugs
133	2024	***	male	2Y7M	Drug intoxication	Antipsychotic drugs
134	2024	***	male	1M6D	Chemical intoxication	Chemical preparations (for household use)
135	2024	***	female	2Y	Chemical intoxication	Chemical preparations (for household use)
136	2024	***	male	3M24D	Chemical intoxication	Chemical preparations (for household use)
137	2024	***	male	3Y2M	Chemical intoxication	Chemical preparations (for household use)
138	2024	***	female	1Y11M	Chemical intoxication	Chemical preparations (industrial)
139	2024	***	male	4Y5M	gas poisoning	CO
140	2024	***	female	13Y4M	pesticide poisoning	herbicide
141	2024	***	male	1Y1M	insect repellant	insect repellant
142	2024	***	male	2Y10M	insect repellant	insect repellant
143	2024	***	male	2Y	mushroom poisoning	mushroom poisoning
144	2024	***	female	13Y5M	Drug intoxication	others
145	2024	***	female	2Y11M	Drug intoxication	others
146	2024	***	male	3Y5M	Drug intoxication	Pediatric drugs
147	2024	***	male	3Y9M	Drug intoxication	Pediatric drugs
148	2024	***	female	4Y9M	Drug intoxication	Pediatric drugs
149	2024	***	male	1Y8M	rodenticide poisoning	rodenticide poisoning
150	2024	***	female	2Y11M	rodenticide poisoning	rodenticide poisoning
151	2025	***	male	3Y	Drug intoxication	antihypertensive drugs
152	2025	***	male	3Y	Drug intoxication	antihypertensive drugs
153	2025	***	female	12Y10M	Drug intoxication	Antipsychotic drugs
154	2025	***	female	12Y11M	Drug intoxication	Antipsychotic drugs
155	2025	***	female	12Y11M	Drug intoxication	Antipsychotic drugs
156	2025	***	female	12Y11M	Drug intoxication	Antipsychotic drugs
157	2025	***	male	12Y3M	Drug intoxication	Antipsychotic drugs
158	2025	***	female	12Y4M	Drug intoxication	Antipsychotic drugs
159	2025	***	female	12Y5M	Drug intoxication	Antipsychotic drugs
160	2025	***	female	12Y5M	Drug intoxication	Antipsychotic drugs
161	2025	***	female	12Y7M	Drug intoxication	Antipsychotic drugs
162	2025	***	female	12Y9M	Drug intoxication	Antipsychotic drugs
163	2025	***	female	13Y10M	Drug intoxication	Antipsychotic drugs
164	2025	***	female	13Y10M	Drug intoxication	Antipsychotic drugs
165	2025	***	female	13Y10M	Drug intoxication	Antipsychotic drugs
166	2025	***	female	13Y10M	Drug intoxication	Antipsychotic drugs
167	2025	***	female	13Y11M	Drug intoxication	Antipsychotic drugs
168	2025	***	female	13Y11M	Drug intoxication	Antipsychotic drugs
169	2025	***	female	13Y11M	Drug intoxication	Antipsychotic drugs
170	2025	***	female	13Y2M	Drug intoxication	Antipsychotic drugs
171	2025	***	female	13Y3M	Drug intoxication	Antipsychotic drugs
172	2025	***	female	13Y3M	Drug intoxication	Antipsychotic drugs
173	2025	***	female	13Y4M	Drug intoxication	Antipsychotic drugs
174	2025	***	female	13Y7M	Drug intoxication	Antipsychotic drugs
175	2025	***	female	13Y7M	Drug intoxication	Antipsychotic drugs
176	2025	***	female	13Y8M	Drug intoxication	Antipsychotic drugs
177	2025	***	male	13Y8M	Drug intoxication	Antipsychotic drugs
178	2025	***	female	13Y9M	Drug intoxication	Antipsychotic drugs
179	2025	***	male	2Y2Y	Drug intoxication	Antipsychotic drugs
180	2025	***	female	3Y	Drug intoxication	Antipsychotic drugs
181	2025	***	female	1Y6M	Chemical intoxication	Chemical preparations (for household use)
182	2025	***	male	1Y6M	Chemical intoxication	Chemical preparations (for household use)
183	2025	***	male	1Y6M	Chemical intoxication	Chemical preparations (for household use)
184	2025	***	male	1Y6M	Chemical intoxication	Chemical preparations (for household use)
185	2025	***	female	3Y	Chemical intoxication	Chemical preparations (for household use)
186	2025	***	male	4M7D	Chemical intoxication	Chemical preparations (for household use)
187	2025	***	male	4Y	Chemical intoxication	Chemical preparations (for household use)
188	2025	***	male	6Y2M	Chemical intoxication	Chemical preparations (for household use)
189	2025	***	male	9Y7M	Chemical intoxication	Chemical preparations (for household use)
190	2025	***	female	12Y11M	pesticide poisoning	herbicide
191	2025	***	female	12Y5M	pesticide poisoning	herbicide
192	2025	***	female	13Y5M	gas poisoning	natural gas
193	2025	***	female	11Y9M	Drug intoxication	others
194	2025	***	female	12Y11M	Drug intoxication	others
195	2025	***	female	13Y11M	Drug intoxication	others
196	2025	***	male	2Y10Y	Drug intoxication	others
197	2025	***	male	2Y10Y	Drug intoxication	others
198	2025	***	male	2Y11M	Drug intoxication	others
199	2025	***	female	2Y1M	Drug intoxication	others
200	2025	***	female	4Y	Drug intoxication	others
201	2025	***	male	5Y5M	Drug intoxication	others
202	2025	***	female	13Y9M	Drug intoxication	Pediatric drugs
203	2025	***	male	1Y	Drug intoxication	Pediatric drugs
204	2025	***	male	1Y9M	Drug intoxication	Pediatric drugs
205	2025	***	male	3Y11Y	Drug intoxication	Pediatric drugs
206	2025	***	male	3Y6Y	Drug intoxication	Pediatric drugs
207	2025	***	female	2Y10M	Drug intoxication	others
208	2025	***	male	8Y	Drug intoxication	others
